# Supplementary material
Source: HighWire-hosted journal article supplement (https://www.annfammed.org/highwire/filestream/7768/field_highwire_adjunct_files/7/Jaen_SuppApp7.pdf)
Supplement: Jaen_SuppApp7.pdf [file Jaen_SuppApp7.pdf]

**Online Supplementary Material**

Jaén CR, Crabtree BF, Palmer R, et al. Methods for evaluating practice change toward a patient-centered medical home. *Ann Fam Med*. 2010;8(Suppl 1):S9-S20.

[http://www.annfammed.org/cgi/content/full/8/Suppl\\_1/S9/DC1](http://www.annfammed.org/cgi/content/full/8/Suppl_1/S9/DC1)

---

**Supplemental Appendix 7. TransforMED Key Stakeholder Interview Guide**

The appendix begins on the next page.

## TransformMED Key Stakeholder Interview Guide

**Sampling: For those key stakeholders in the practice who are selected for interview, these issues should also be added to the discussion.**

### Motivation of Key Stakeholders

- What gets you excited about this practice? Describe what rings your bell.
  - What drives decisions?
  - What gets attention?
- What gets others excited about this practice?
- Are there people in the practice with really special interests?
  - Bees in the bonnet?
  - Special champions?
- Who are the people that really get things done in the practice?
  - How do they do that?

### Choices for Change

- Describe current options and opportunities for change for your practice.
  - How is this different from 6 months ago?
- How has the practice changed in the last 6 months?
  - How did that happen?

### Outside Motivators

- Describe any changes in your external environment over the last 6 months (e.g. rules and regulations, insurance, hospital system, malpractice, etc.)
  - What happened? Were there any surprises?
  - How did it affect the practice?
  - Have any of these been real barriers to your change efforts?
  - Have there been stimulants to your change efforts?

### Attention to the Fitness Landscape

- Describe how the practice stays in touch with the community
  - What is going on with your patients? With your former patients?
  - Who?
- Describe how the practice stays in touch with the rest of the health care system
  - What do you think other practices are doing? The hospitals?
  - Which ones?
- Describe how the practice seeks to influence the community
  - What marketing efforts is the practice pursuing (e.g. advertising)?
  - Who is the target?
- Describe how the practice seeks to influence the health care system
  - Does staff hold memberships in medical or other professional organizations? Hospital committees?
  - Who? Which organizations?
